# Supplementary material for: A novel ZEYBEK-1 Model: A Rule-Based Expert System for Systematic Hydrocarbon Exploration Targeting
Source: Research Square preprint supplement (doi:10.21203/rs.3.rs-8467568/v1), 2026-01-08
Supplement: Supplementary file 1 [file 926d70bfc767d384e87d6baa.docx]

Highlights

- The ZEYBEK-1 Model provides a deterministic framework for complex structural settings.
- The rule-based approach systematizes source–reservoir–trap spatial relations.
- The model makes exploration-critical spatial relationships quantitative and reproducible.
- Application results enhance decision-support efficiency in early exploration stages.
